# Supplementary material for: Structural Studies and Optical and Electrical Properties of Novel Gd3+‐Doped Sb2Se3 Nanorods
Source: Hindawi journal article supplement (doi:10.1155/2012/983150), 2012-01-01
Supplement: f1 [file 983150.f1.pdf]

Supplementary data

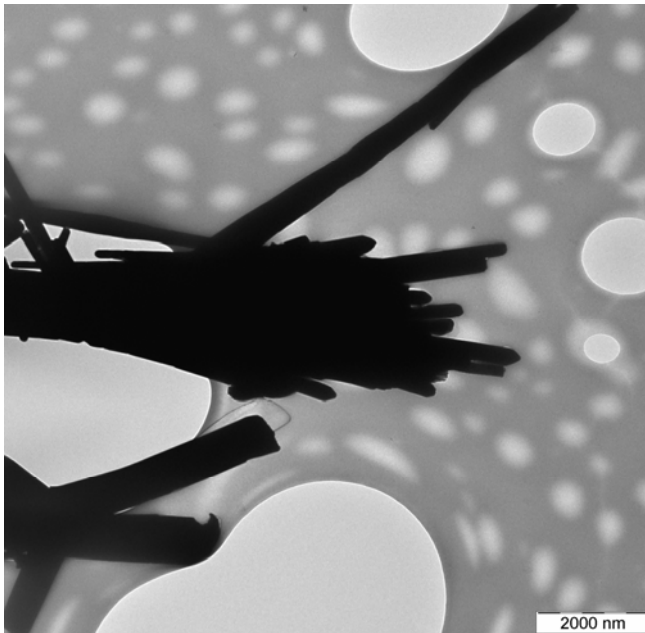

Fig.1.TEM image of  $\text{Sb}_2\text{Se}_3$  nanorods.

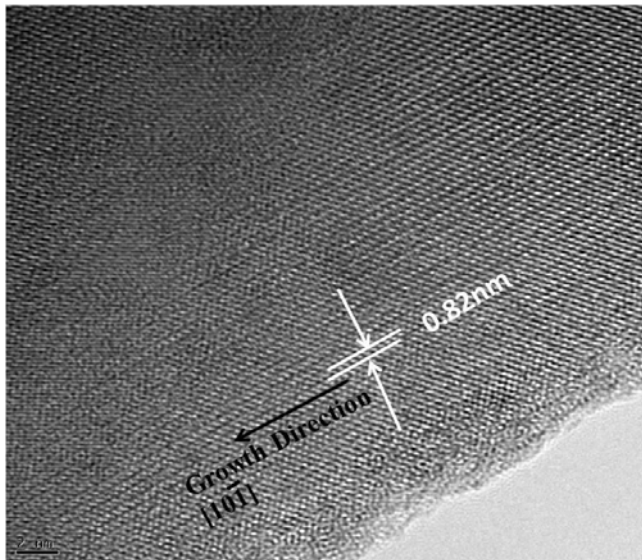

Fig.2.HRTEM image of the  $\text{Sb}_2\text{Se}_3$  nanorods.

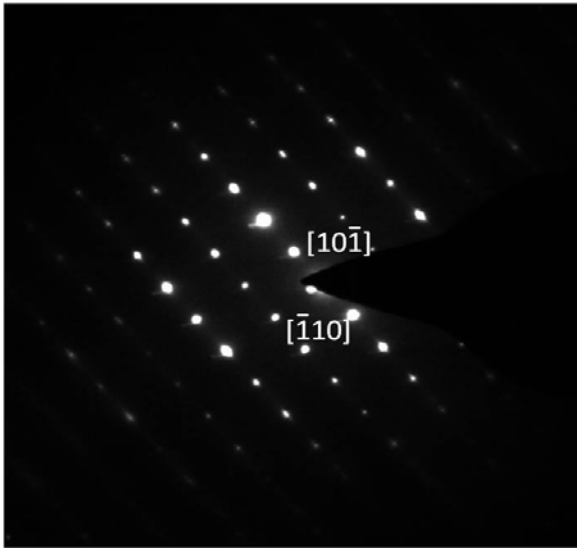

Fig.3. SAED Pattern of the Sb<sub>2</sub>Se<sub>3</sub> nanorods. The SAED zone axis is [10-1].
